# Supplementary material for: The Level of FGF 21 as a New Risk Factor for the Occurrence of Cardiometabolic Disorders amongst the Psoriatic Patients
Source: PubMed Central journal article supplement (PMC6947480; doi:10.3390/jcm8122206), 2019-12-13
Supplement: jcm-08-02206-s001.pdf [file jcm-08-02206-s001.pdf]

**Table S1.** Comparison of inflammation, morphological, and metabolic parameters at the start of the study as well as after treatment regarding BMI-scoring.

| Parameter                                | Before Treatment |                 |                        | After Treatment             |                              |                              |
|------------------------------------------|------------------|-----------------|------------------------|-----------------------------|------------------------------|------------------------------|
|                                          | BMI I (n = 10)   | BMI II (n = 11) | BMI III (n = 12)       | BMI I (n = 10)              | BMI II (n = 11)              | BMI III (n = 12)             |
| PASI                                     | 15.1 ± 6.53      | 17.3 ± 7.83     | 18.7 ± 8.91            | 2.5 (1.8–15) <sup>^^^</sup> | 5.4 (1.8–12.5) <sup>^^</sup> | 3.85 (0.7–8.4) <sup>^^</sup> |
| Hemoglobin [mg/dl]                       | 13.7 ± 1.53      | 13.2 ± 1.87     | 13.8 ± 1.62            | 13.1 ± 1.7                  | 13.2 ± 1.73                  | 13.2 ± 1.01                  |
| Red Blood Cells [x10 <sup>3</sup> /mL]   | 4.3 ± 0.49       | 4.29 ± 0.64     | 4.52 ± 0.56            | 4.17 ± 0.43                 | 4.34 ± 0.6                   | 4.33 ± 0.39                  |
| White Blood Cells [x10 <sup>3</sup> /mL] | 7.18 ± 2.12      | 6.87 ± 1.4      | 8.33 ± 1.87            | 6.1 ± 1.42                  | 6.6 ± 1.32                   | 7.08 ± 1.94                  |
| Platelets [x10 <sup>3</sup> /mL]         | 249 ± 83.8       | 257 ± 76.5      | 247 ± 66.8             | 222 ± 75.9                  | 246 ± 47.8                   | 225 ± 56.5                   |
| Glucose [mg/dl]                          | 80 (53–215)      | 80 (69–99)      | <b>99.5 (53–323) *</b> | 86 (55–112)                 | 87 (78–97)                   | 97.5 (65–140)                |
| C-Reactive Protein [mg/L]                | 3.67 (1–16.1)    | 4.07 (1–28.6)   | 7.95 (1.48–34.7)       | <b>1.2 (0.5–2.4) ^</b>      | 3.2 (1–15)                   | <b>2.4 (1–6) ^^</b>          |
| Alanine-Aminotransferase [IU/L]          | 19.9 ± 9.87      | 17.9 ± 6.82     | <b>33 ± 12.1 **</b>    | 17.1 ± 4.07                 | 16.5 ± 6.06                  | <b>28.2 ± 10.7 **</b>        |
| Aspartate-Aminotransferase [IU/L]        | 20 (15–86)       | 19 (14–27)      | 23.5 (15–47)           | 18.5 (14–39)                | 16 (12–28)                   | 21 (13–52)                   |
| Total Cholesterol [mg/dl]                | 158 ± 47.5       | 168 ± 31.6      | 183 ± 37.1             | 156 ± 43.5                  | 180 ± 41.2                   | 167 ± 31.3                   |
| Triglicerydes [mg/dl]                    | 110 ± 76.8       | 133 ± 48.4      | <b>165 ± 55.8 *</b>    | 101 ± 64.7                  | 127 ± 58.8                   | <b>130 ± 40.2 ^</b>          |

\*/\*\*—statistical significances with *p* values <0.05/0.01, respectively between subgroups of BMIs. ^/^^/^^^—statistical significances with *p* values <0.05/0.01/0.0001S, respectively between group Before Treatment and After Treatment.

**Table S2.** Comparison of inflammation, morphological, and metabolic parameters at the start of the study as well as after treatment regarding PASI-scoring.

| Parameter                                | Before Treatment |                |                      | After Treatment           |                             |                             |
|------------------------------------------|------------------|----------------|----------------------|---------------------------|-----------------------------|-----------------------------|
|                                          | PASI I           | PASI II        | PASI III             | PASI I                    | PASI II                     | PASI III                    |
| PASI                                     | 8.75 ± 1.92      | 14.1 ± 2.68*** | 26.1 ± 4.05***###    | 2.95 ± 1.9 <sup>^^^</sup> | 3.92 ± 3 <sup>^^^</sup>     | 6.3 ± 3.51* <sup>^^^</sup>  |
| Hemoglobin [mg/dl]                       | 14.4 ± 1.34      | 13.7 ± 1.49    | 12.8 ± 1.83          | 13.5 ± 0.92               | 13.3 ± 1.93                 | 12.7 ± 1.06                 |
| Red Blood Cells [x10 <sup>3</sup> /mL]   | 4.61 ± 0.48      | 4.35 ± 0.61    | 4.25 ± 0.55          | 4.33 ± 0.32               | 4.27 ± 0.62                 | 4.27 ± 0.39                 |
| White Blood Cells [x10 <sup>3</sup> /mL] | 7.62 ± 2.24      | 7.35 ± 1.96    | 7.57 ± 1.67          | 6.64 ± 1.65               | 6.4 ± 1.32                  | 6.86 ± 1.92                 |
| Platelets [x10 <sup>3</sup> /mL]         | 230 ± 41.6       | 257 ± 68.7     | 258 ± 94.5           | 226 ± 59.7                | 239 ± 63.4                  | 226 ± 59.5                  |
| Glucose [mg/dl]                          | 94.5 (78–135)    | 83 (69–215)    | 82 (53–123)          | 88.5 (81–125)             | 86 (65–120)                 | 89 (55–140)                 |
| C-Reactive Protein [mg/L]                | 2.08 (1–7.3)     | 4 (1–7.2)      | 15.9(5.13–34.7)***## | 1.45 (1–2.46)             | 1.3 (0.5–13.2) <sup>^</sup> | 4.11 (1–15)* <sup>^^^</sup> |
| Alanine-Aminotransferase [IU/L]          | 26 ± 13.3        | 18.1 ± 6.2     | 29.1 ± 13.5          | 20.3 ± 6.92               | 19 ± 5                      | 23.5 ± 13.5                 |
| Aspartate-Aminotransferase [IU/L]        | 21.1 ± 4.36      | 20.6 ± 4.89    | 30.3 ± 19.8          | 20.1 ± 5.91               | 19.5 ± 4.67                 | 24.4 ± 12.8                 |
| Total Cholesterol [mg/dl]                | 177 ± 43.4       | 173 ± 46.3     | 163 ± 28.5           | 159 ± 35.6                | 168 ± 51.8                  | 173 ± 22.4                  |
| Triglicerydes [mg/dl]                    | 168 ± 73.5       | 134 ± 69.7     | 121 ± 43.6           | 135 ± 54.3                | 121 ± 69                    | 109 ± 36.1                  |

\*/\*\*/\*\*\*—statistical significances with *p* values <0.05/0.01/0.0001, respectively between PASI I and other subgroups of PASI. #—statistical significances with *p* values <0.05 between PASI II and PASI III. ^/^^/^^^—statistical significances with *p* values <0.05/0.01/0.0001S, respectively between group Before Treatment and After Treatment.
